# Supplementary material for: Evidence for a non-linear carbon accumulation pattern along an Alpine glacier retreat chronosequence in Northern Italy
Source: PeerJ journal article supplement (doi:10.7717/peerj.7703), 2019-10-10
Supplement: Figure_S1.pdf [file Figure_S1.pdf]

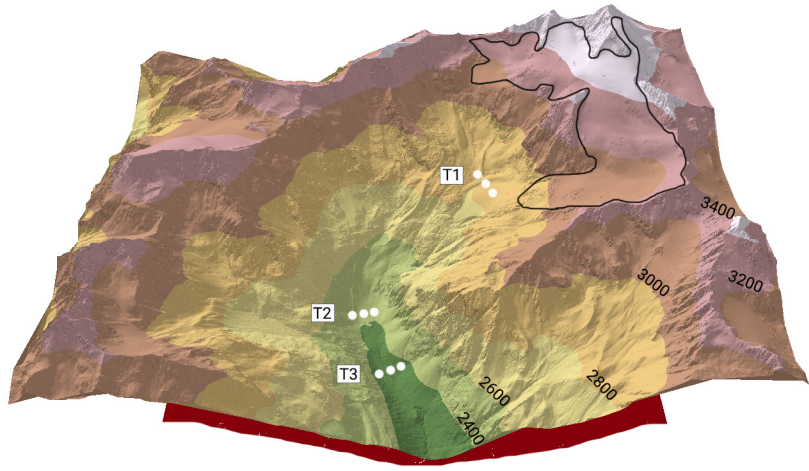

— Glacier extent 2011
