# Supplementary material for: Evidence for a non-linear carbon accumulation pattern along an Alpine glacier retreat chronosequence in Northern Italy
Source: PeerJ journal article supplement (doi:10.7717/peerj.7703), 2019-10-10
Supplement: Figure_S2.pdf [file Figure_S2.pdf]

S2\_Images of the collars and the sampled portions of ecosystem.

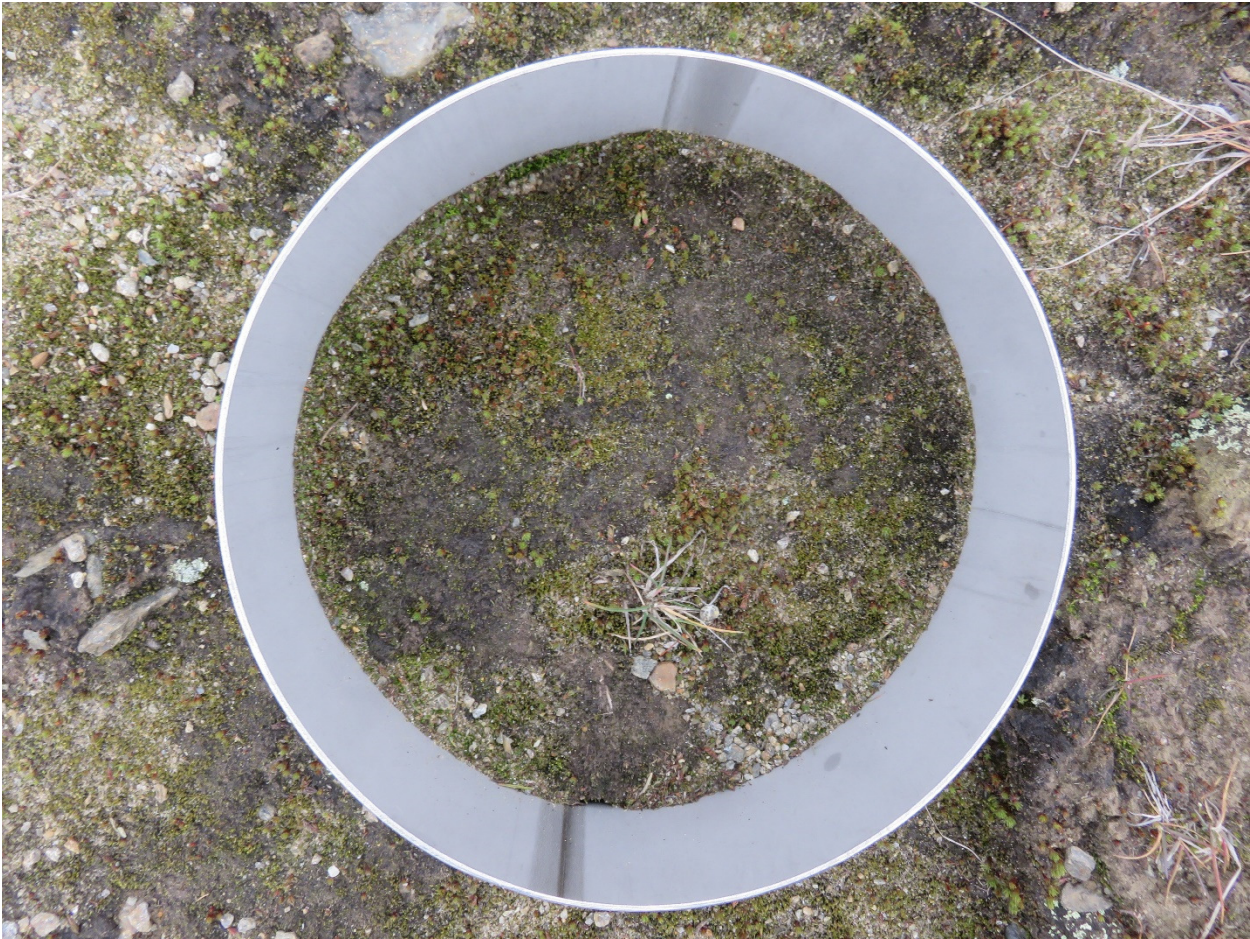

T1C1



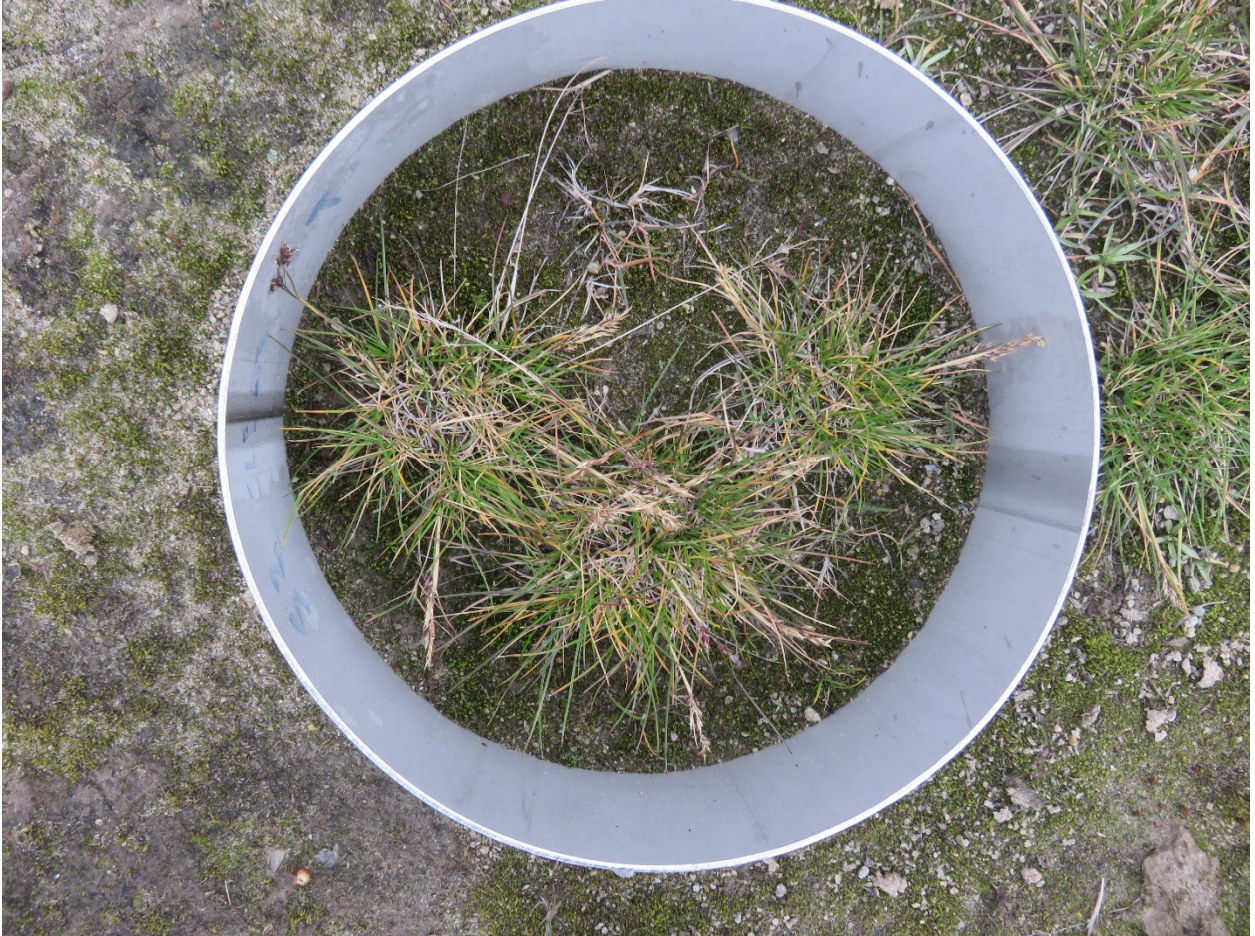

T1C2



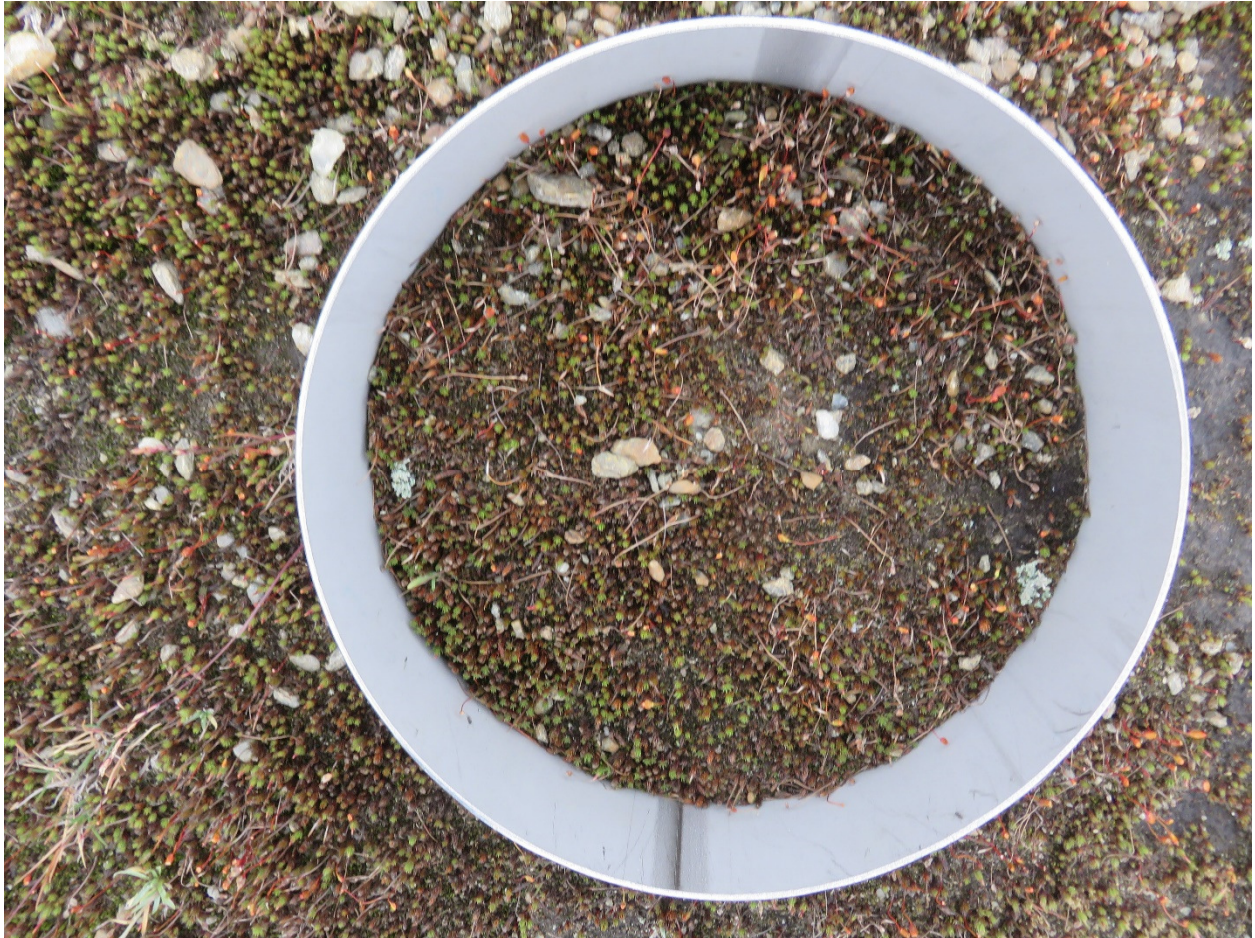

T1C3



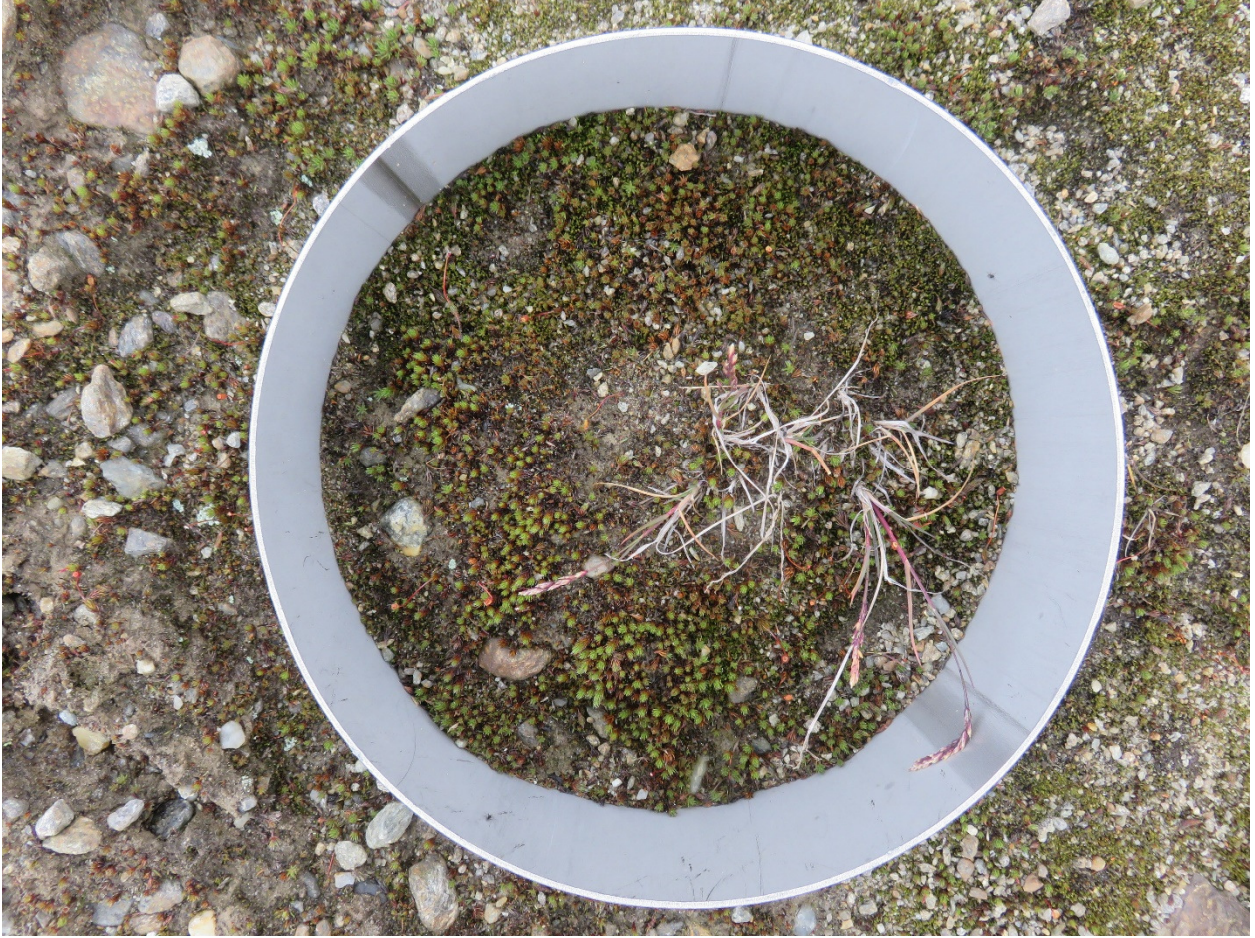

T1C4



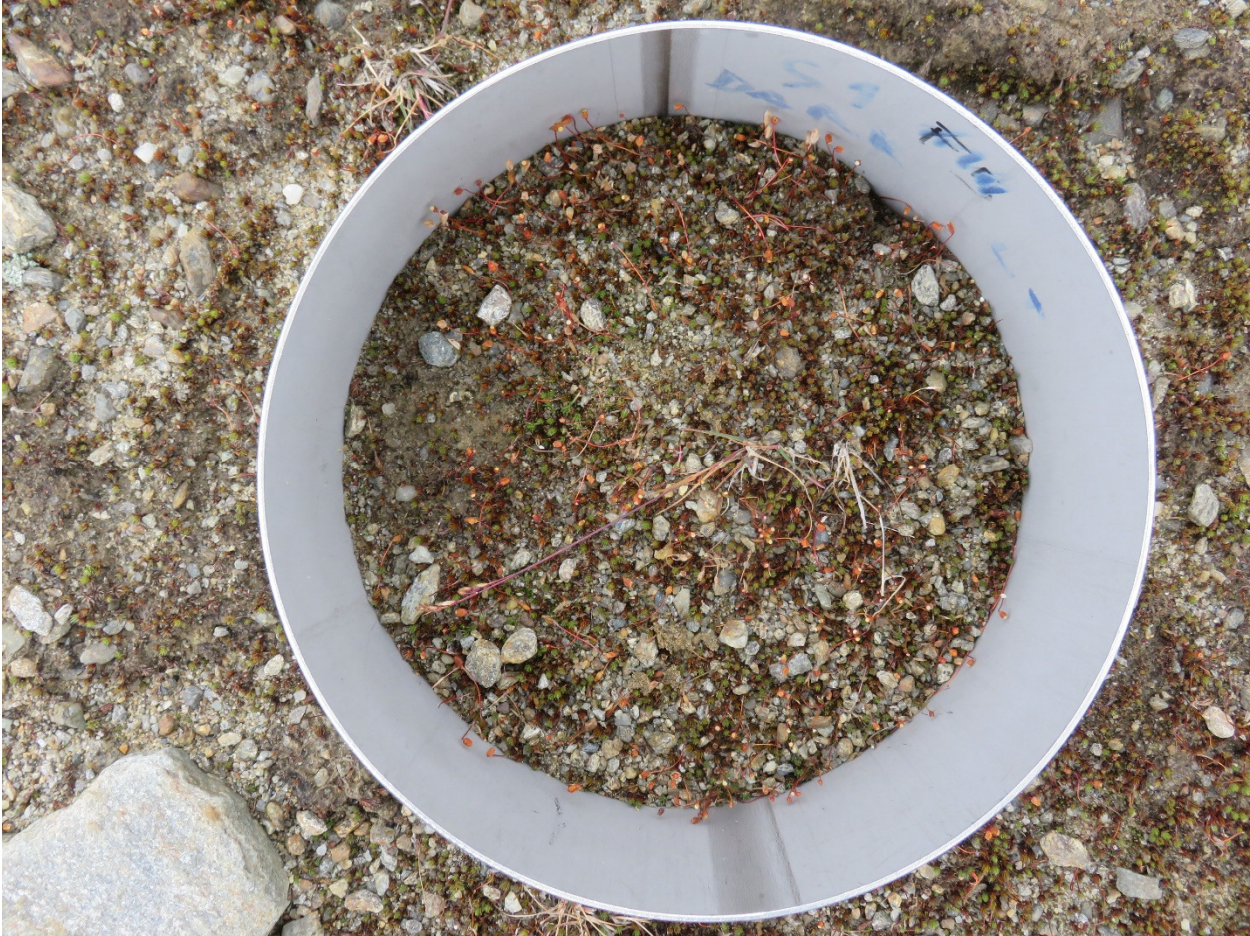

T1C5



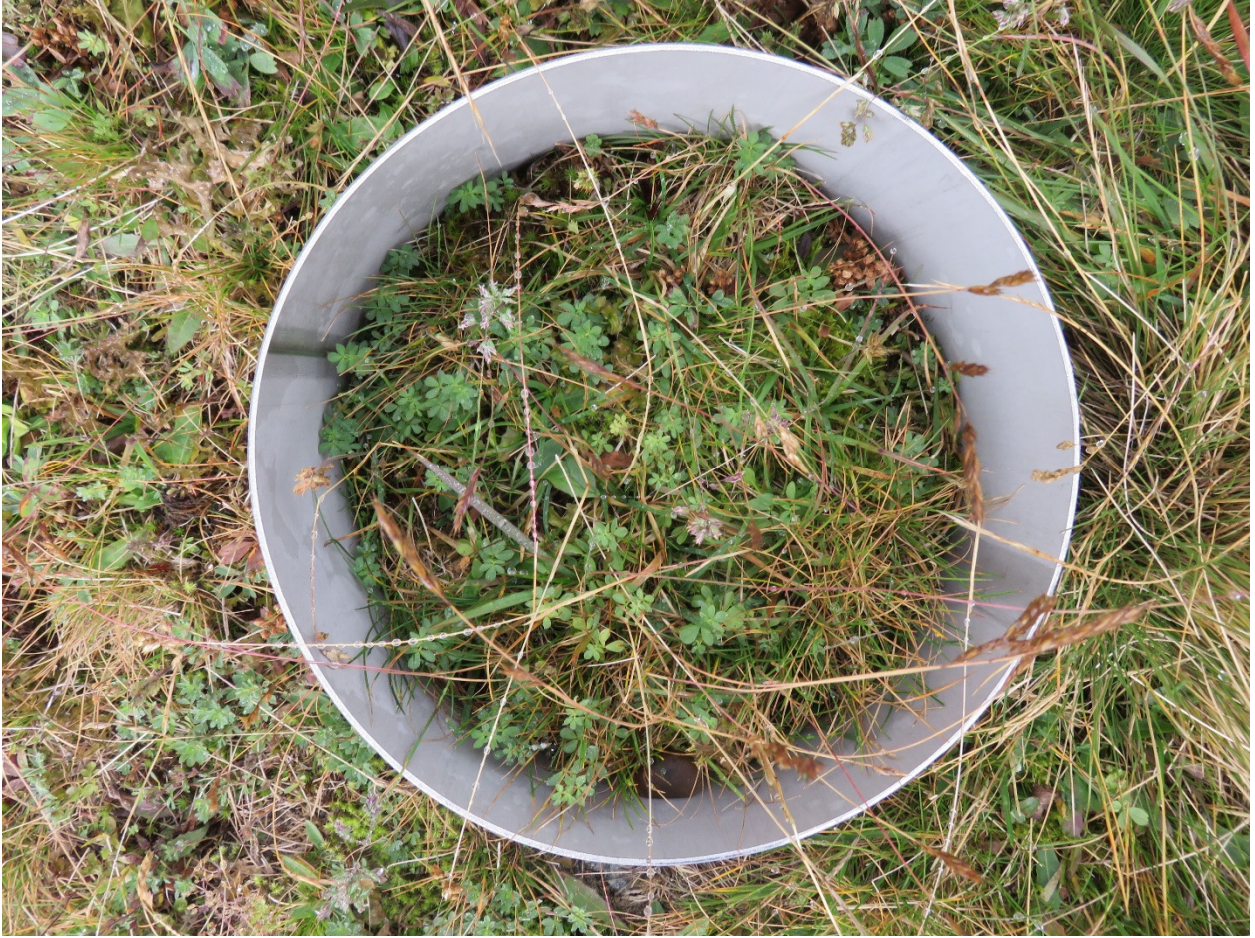

T2C1



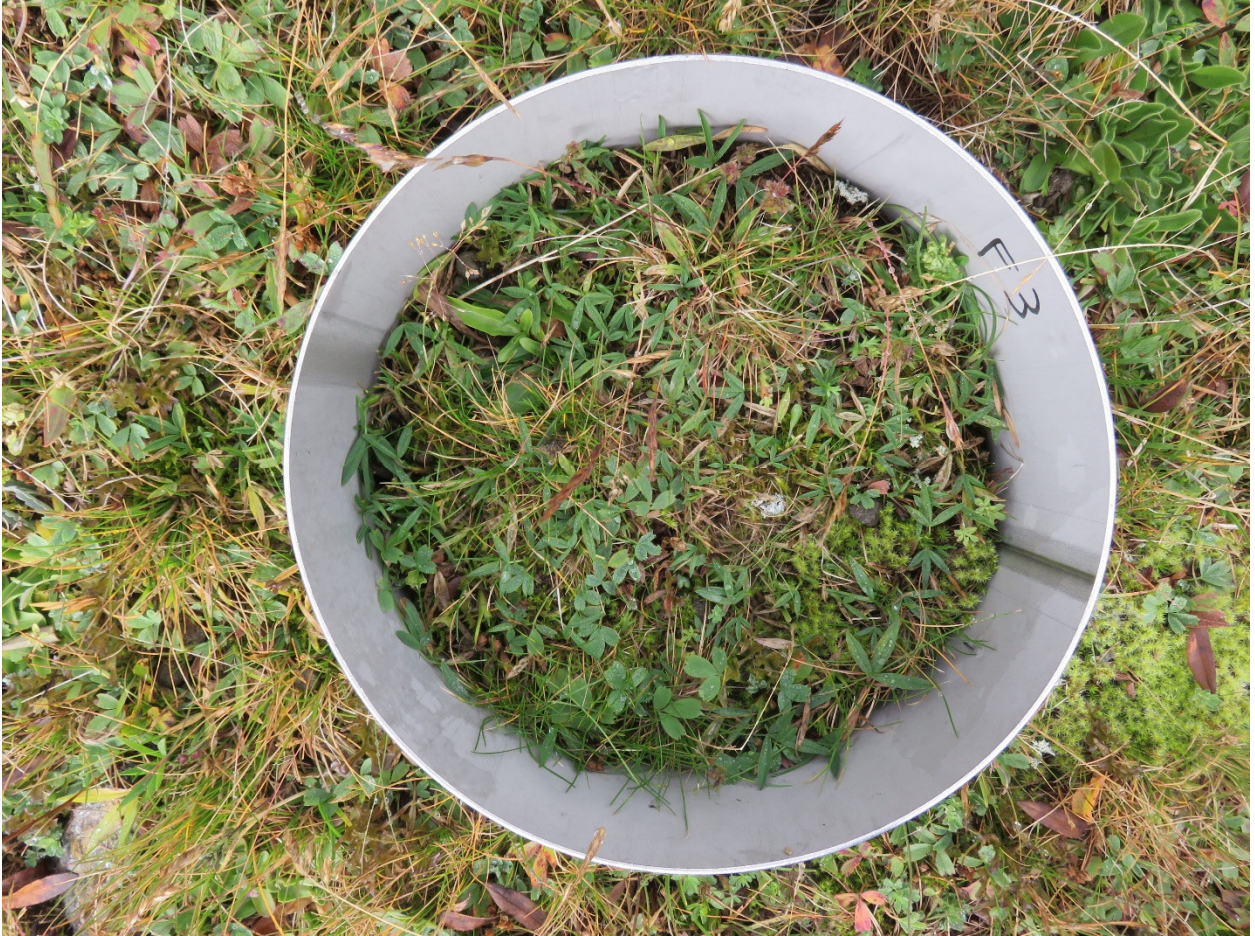

T2C2



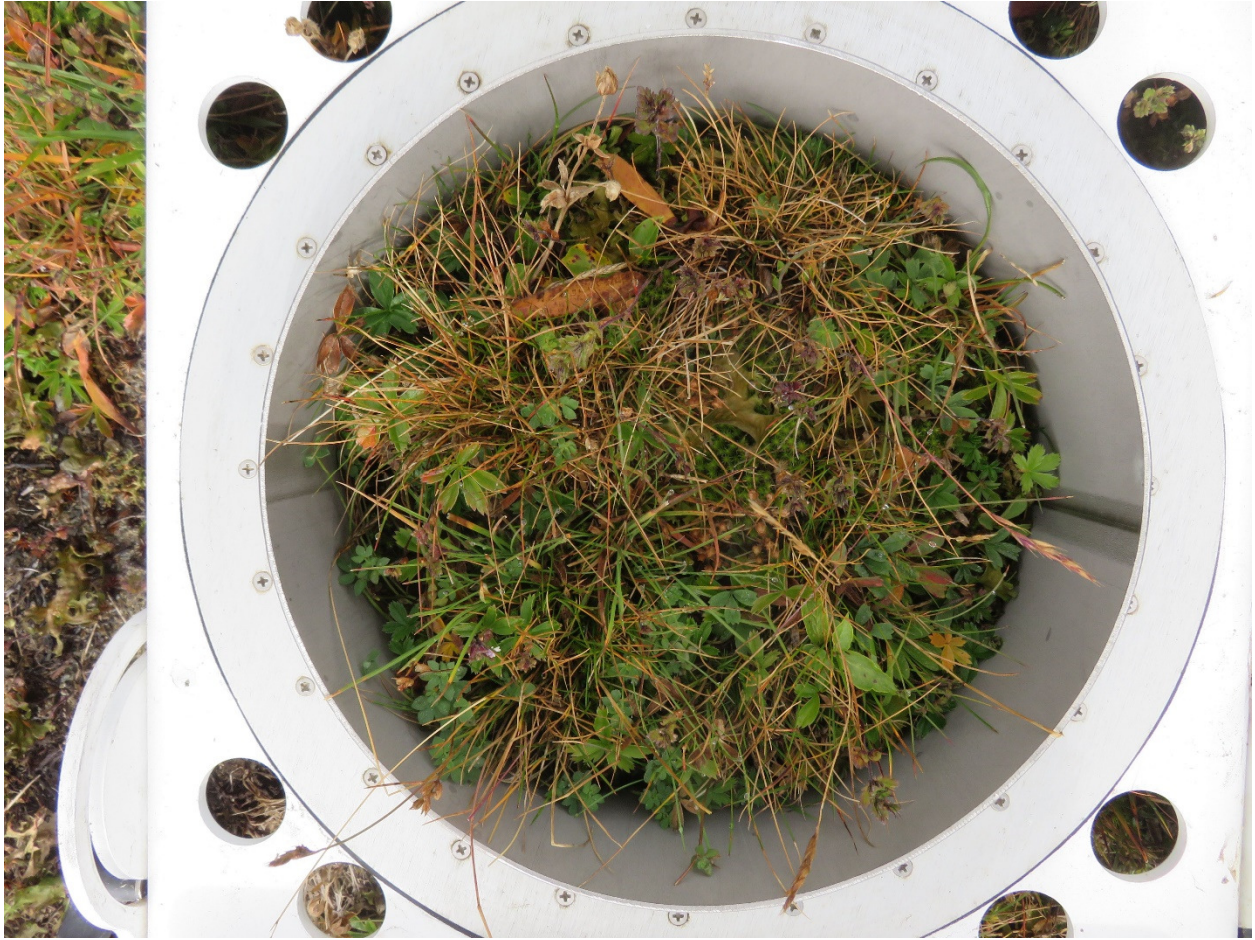

T2C3



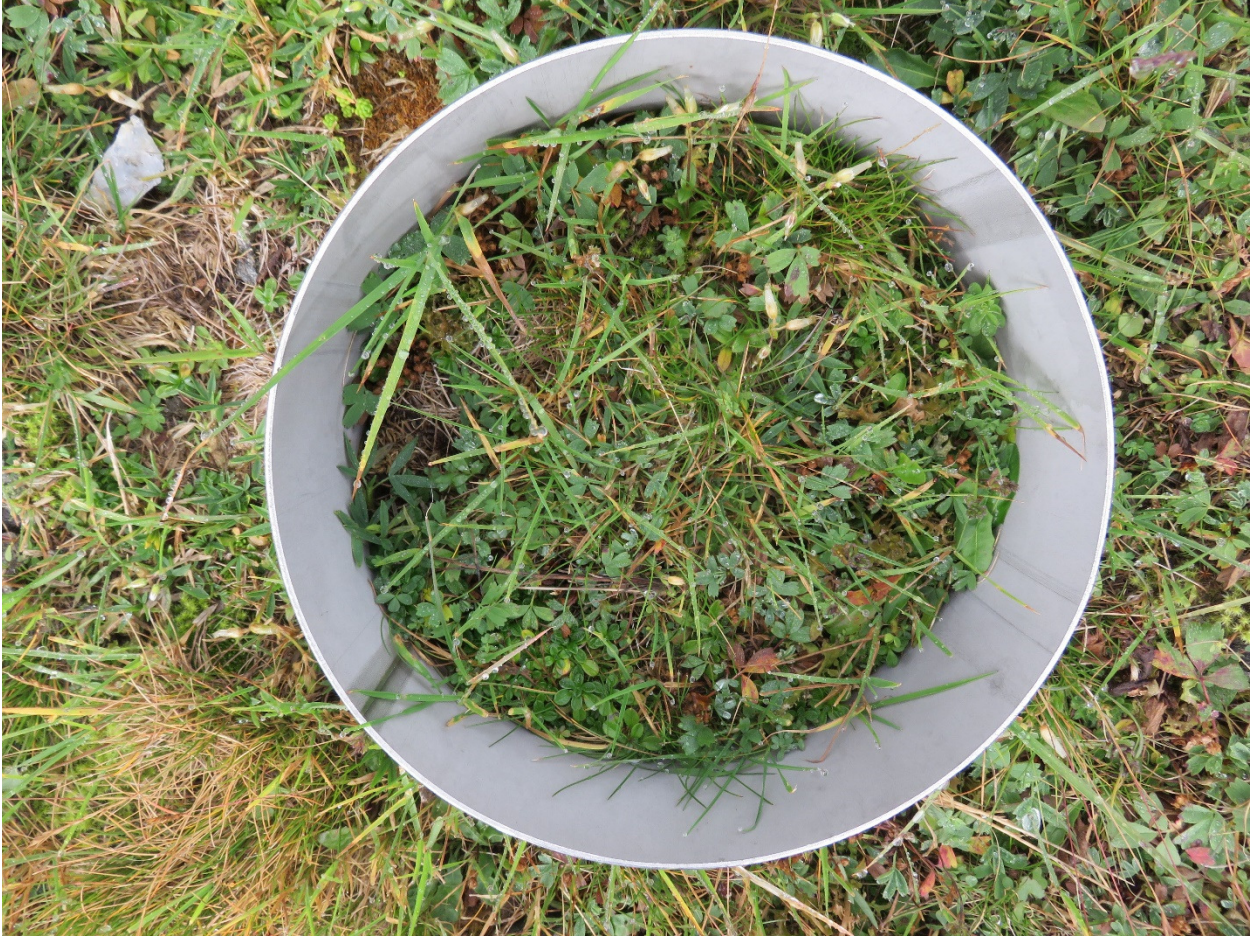

T2C4



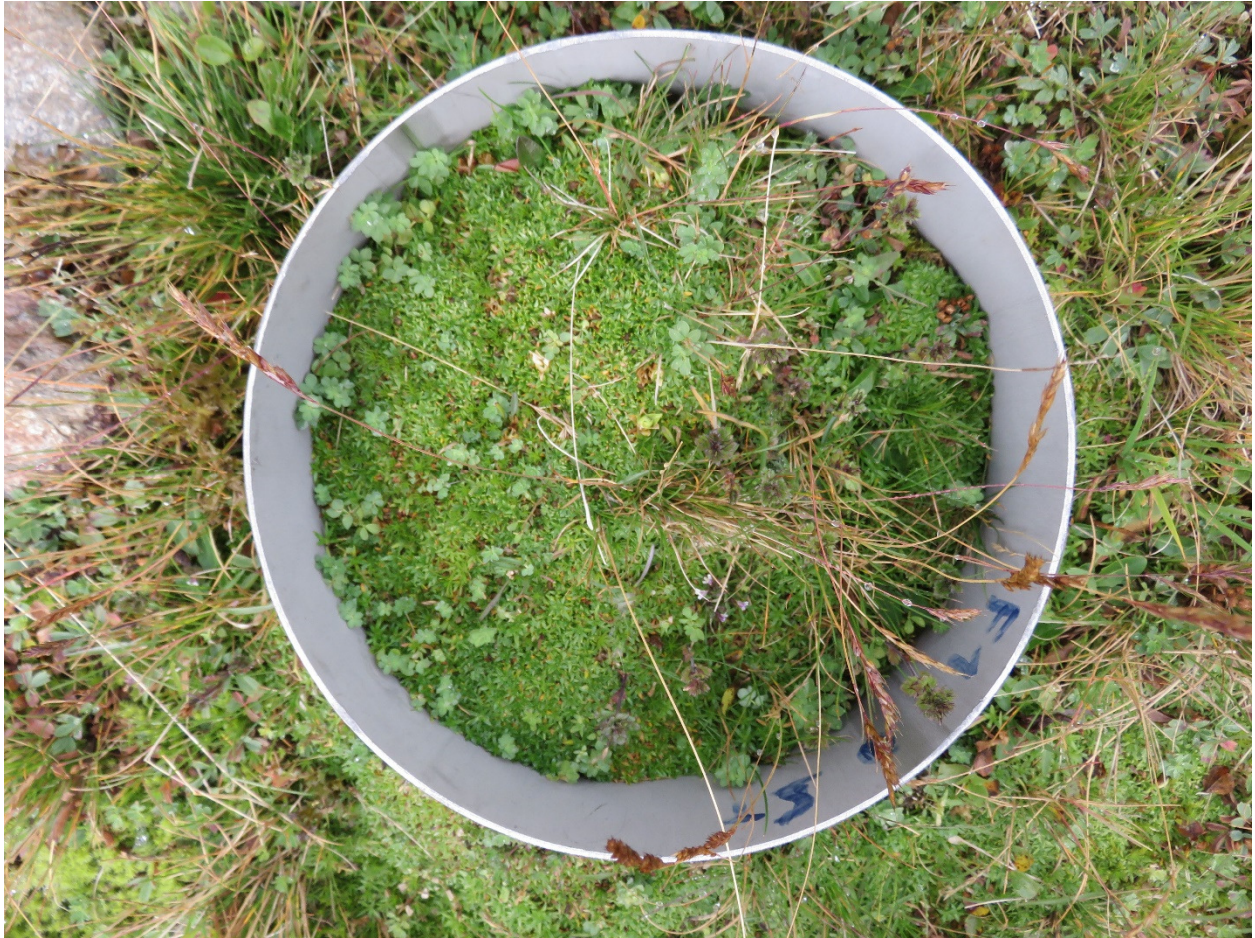

T2C5



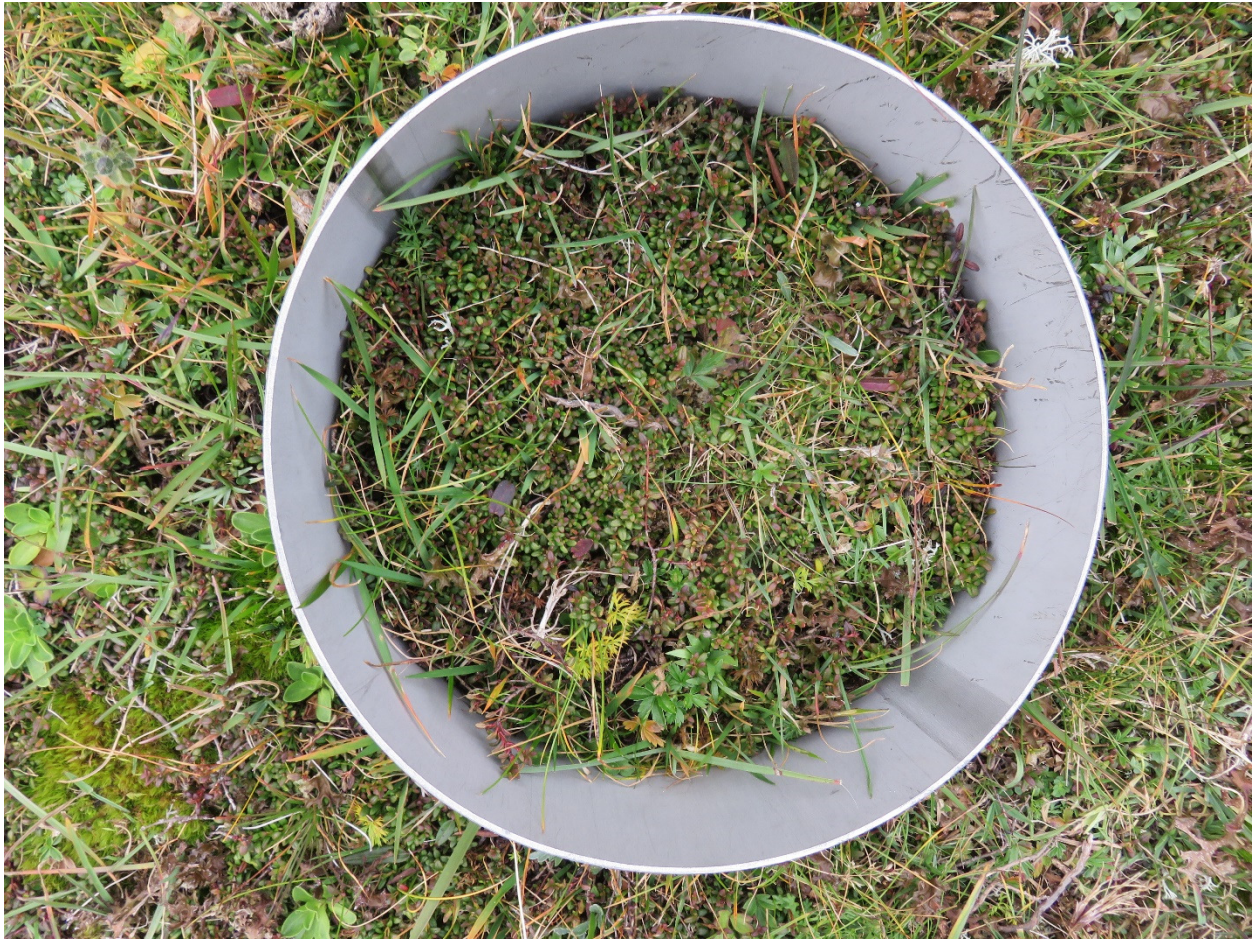

T3C1



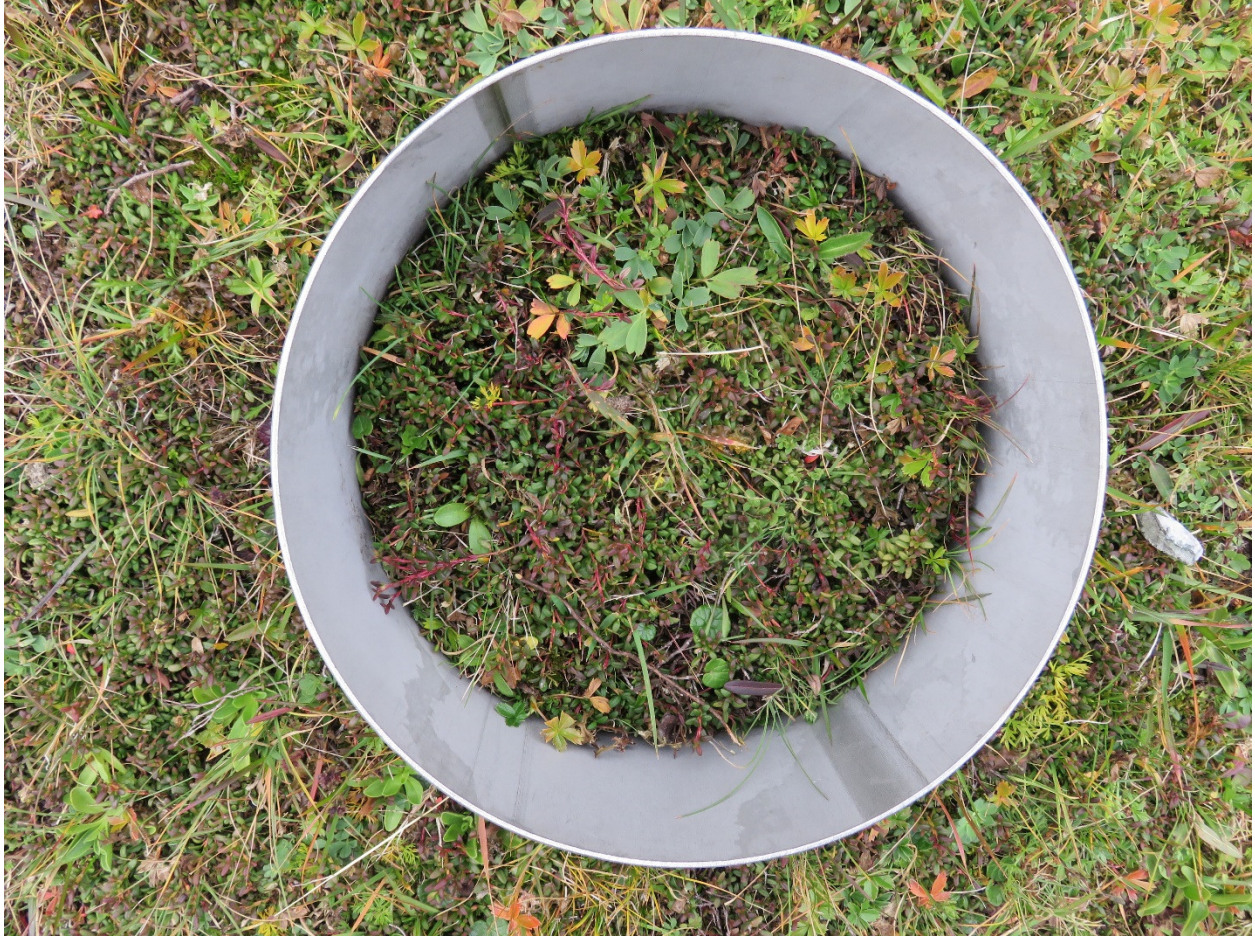

T3C2



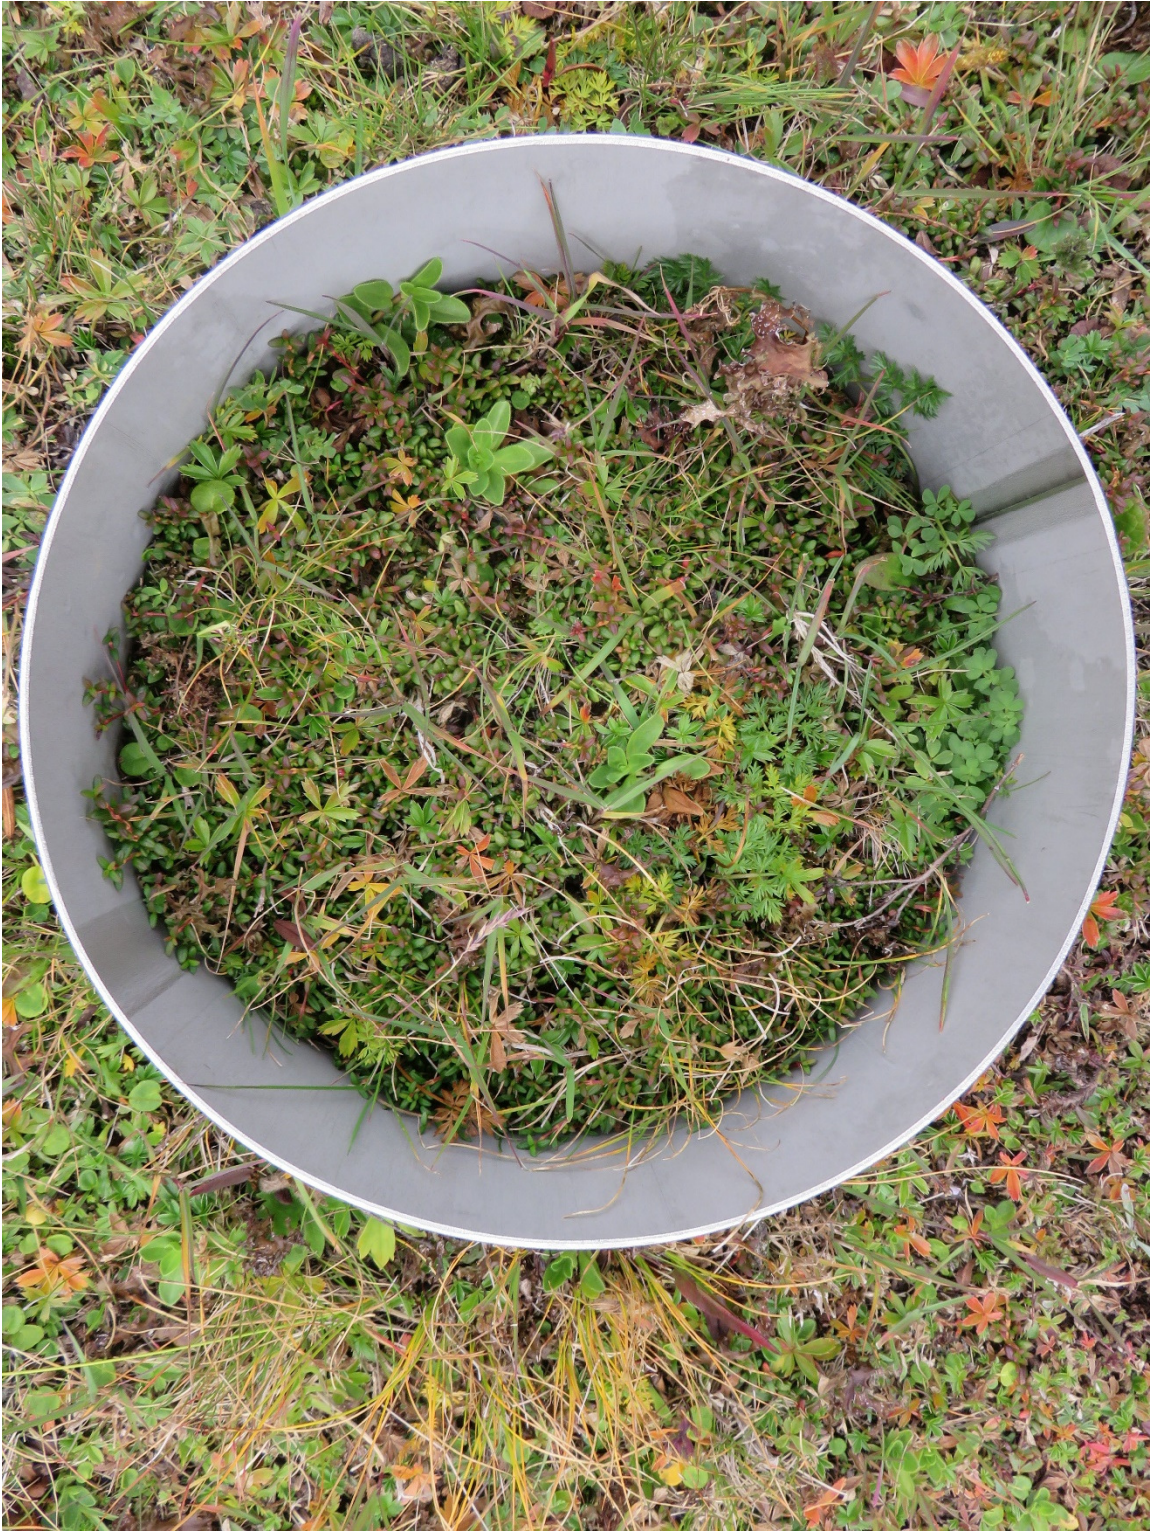

T3C3



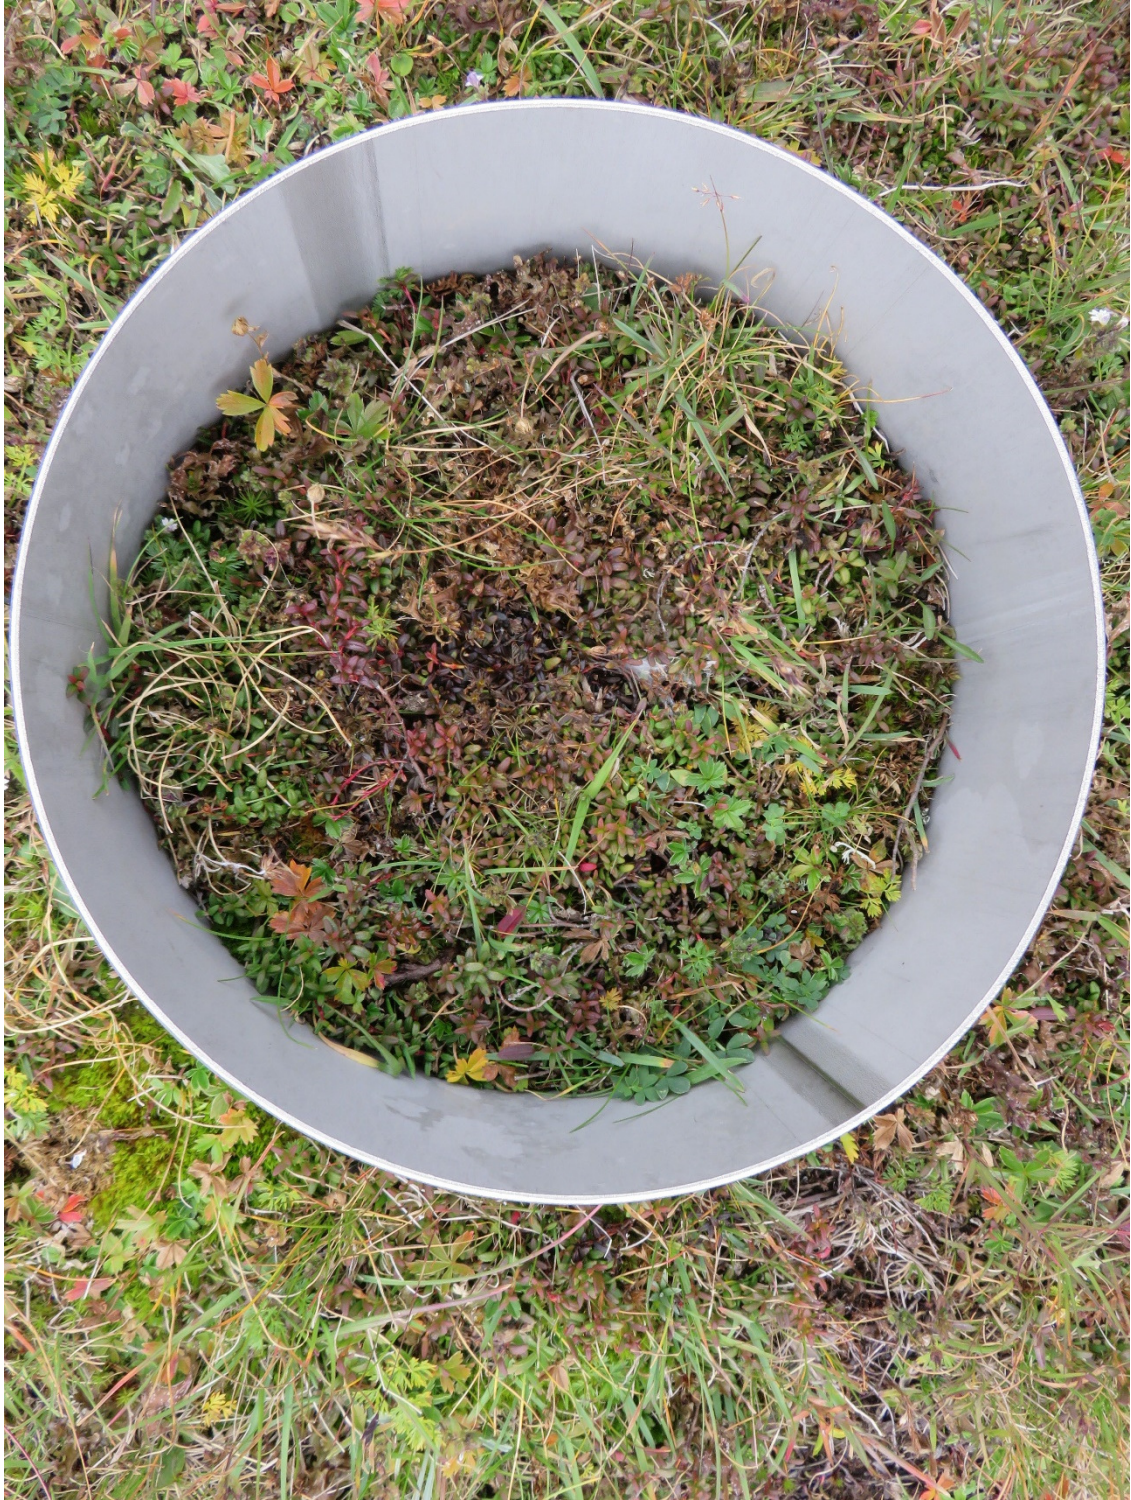

T3C4



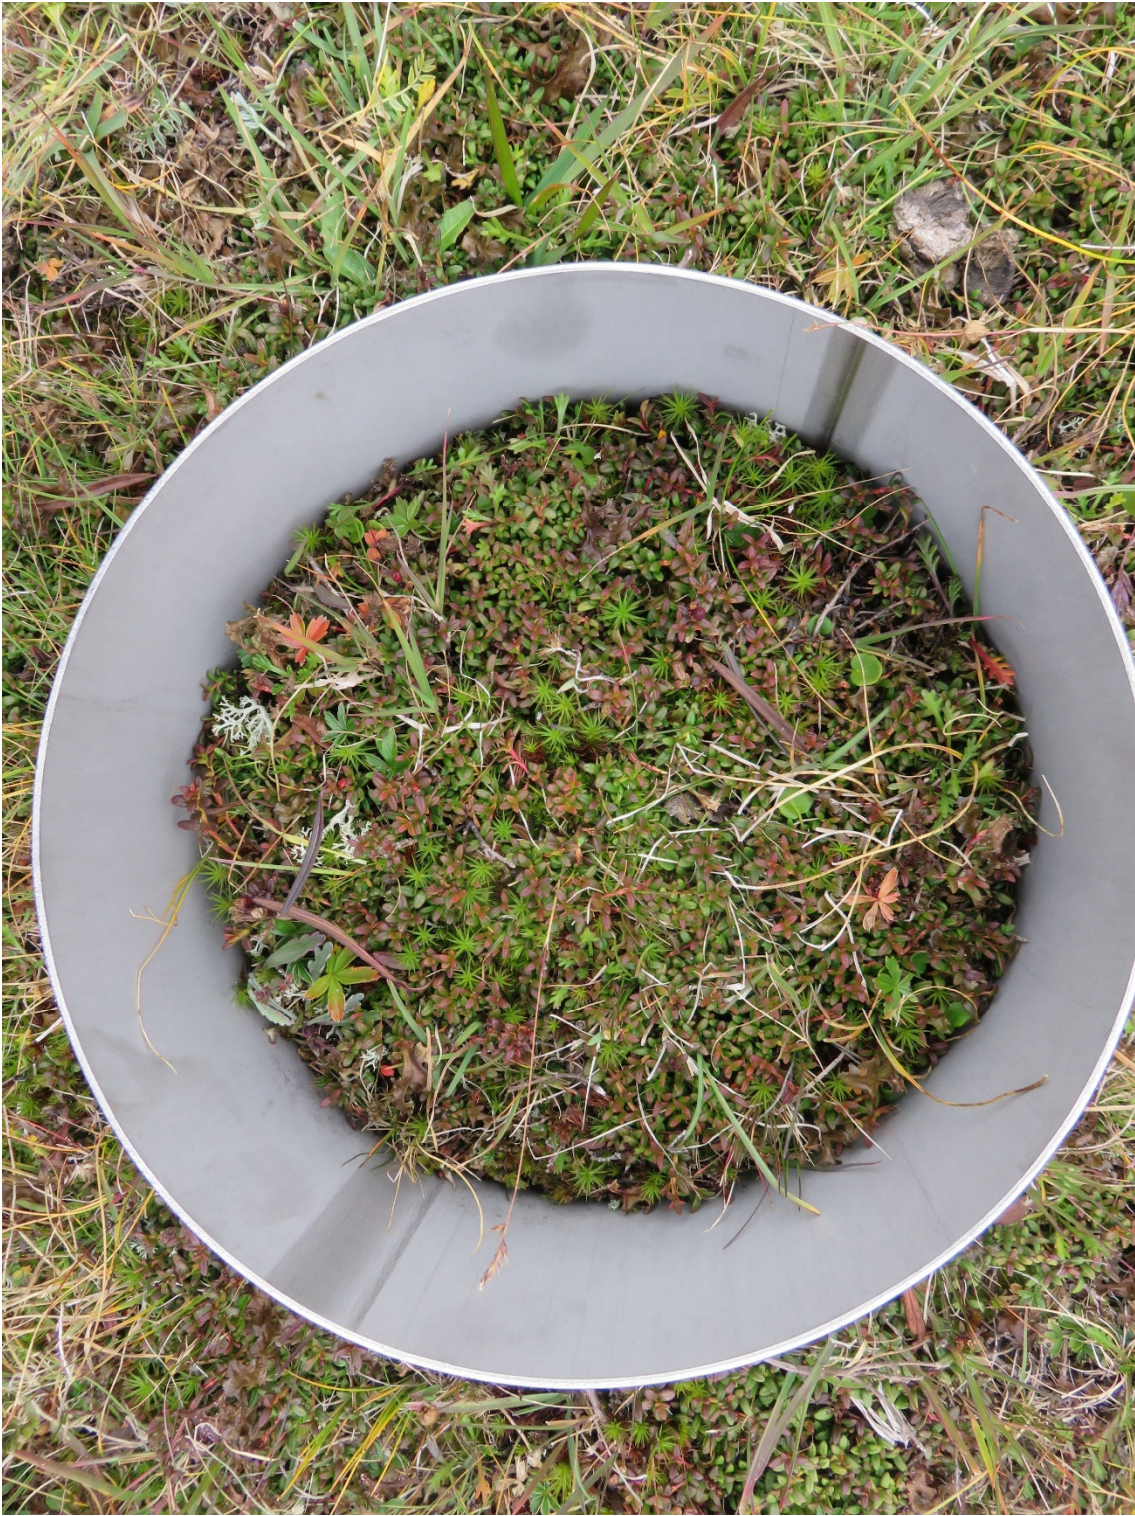

T3C5
